# Supplementary material
Source: PubMed Central journal article supplement (PMC6233800)
Supplement: jamapsychiatry-75-1012-s001.pdf [file jamapsychiatry-75-1012-s001.pdf]

## Supplementary Online Content

van Dalen JW, van Wanrooij LL, van Charante EPM, Brayne C, van Gool WA, Richard E. Association of apathy with risk of incident dementia: a systematic review and meta-analysis. *JAMA Psychiatry*. Published online July 18, 2018. doi:10.1001/jamapsychiatry.2018.1877

**eTable 1.** Full Search Strategy

**eTable 2.** Items on Data Extraction Form

**eTable 3.** Subanalyses and Rationale

**eTable 4.** Estimates for AD and Dementia Compared Within Studies

**eTable 5.** Bias Assessment Score Overview

**eTable 6.** Detailed Bias Assessment Table With Rationale for Scores

**eFigure 1.** Funnel Plot for the Overall Analysis

**eFigure 2.** Forest Plot of Leave-one-out Analysis for Risk Ratios

**eFigure 3.** Sensitivity Analysis With AD Instead of Dementia as Preferential Outcome

**eFigure 4.** Funnel Plot for the Risk Ratios Reported in Studies in Mild Cognitive Impairment

**eFigure 5.** Overall and Subgroup Analyses of HRs in Mild Cognitive Impairment

**eFigure 6.** Funnel Plot of Hazard Ratios Reported in Studies

**eFigure 7.** Meta-regression of Risk Ratios for Developing Dementia in Mild Cognitive Impairment

**eFigure 8.** Subgroup Analyses in MCI Based on Reported Maximally Adjusted Hazard Ratios

**eFigure 9.** Meta-regression of Reported Hazard Ratios for Mild Cognitive Impairment

**eFigure 10.** Meta-regression of Reported Hazard Ratios for Mild Cognitive Impairment Excluding 1 Study

**eFigure 11.** Forest plot of RR in Studies Using Validated and Custom Definitions Of Apathy

**eFigure 12.** Forest plot for Relative Risk of Developing Dementia Including Studies Using Validated and Custom Apathy According to Subgroups Based on Diagnosis

**eFigure 13.** Meta-regression of Log Risk Ratio of Dementia for Patients With Apathy in studies Using Recommended (Blue) and Custom (Grey) Definitions Over Follow-up Time

**eFigure 14.** Meta-regression Results of the Log Risk Ratio for Dementia in Participants With Apathy Predicted by FU-time, Apathy Definition Type and Their Interaction

**eFigure 15.** Overall and Subgroup Analyses of RR in MCI and SCC Patients for Studies Using Custom Definitions of Apathy

This supplementary material has been provided by the authors to give readers additional information about their work.

| Set | Search Statement                                                           |
|-----|----------------------------------------------------------------------------|
| 1.  | Apathy.mp. or exp Apathy/                                                  |
| 2.  | "apathy scale".mp.                                                         |
| 3.  | "apathy evaluation scale".mp.                                              |
| 4.  | "Neuropsychiatric Inventory".mp.                                           |
| 5.  | exp Alzheimer Disease/ or alzheimer*.mp. or exp dementia/ or dementia.mp.  |
| 6.  | hazard.mp.                                                                 |
| 7.  | incident.mp.                                                               |
| 8.  | predict*.mp.                                                               |
| 9.  | exp Risk Factors/ or risk.mp. or exp Risk/                                 |
| 10. | 6 or 7 or 8 or 9                                                           |
| 11. | 1 or 2 or 3 or 4                                                           |
| 12. | 5 and 10 and 11                                                            |
| 13. | Apathy.mp. or exp APATHY/                                                  |
| 14. | "Apathy scale".mp.                                                         |
| 15. | "apathy evaluation scale".mp.                                              |
| 16. | "Neuropsychiatric Inventory".mp.                                           |
| 17. | "Lille Apathy Rating Scale".mp.                                            |
| 18. | exp ALZHEIMER'S DISEASE/ or Alzheimer*.mp. or exp dementia/ or dementia.mp |
| 19. | risk.mp. or exp RISK FACTORS/                                              |
| 20. | hazard.mp.                                                                 |
| 21. | incident.mp.                                                               |
| 22. | predict*.mp.                                                               |
| 23. | 13 or 14 or 15 or 16 or 17                                                 |
| 24. | 19 or 20 or 21 or 22                                                       |
| 25. | 18 and 23 and 24                                                           |
| 26. | apathy.mp. or exp apathy/                                                  |
| 27. | "apathy scale".mp.                                                         |
| 28. | "apathy evaluation scale".mp.                                              |
| 29. | "Neuropsychiatric Inventory".mp.                                           |
| 30. | "Lille Apathy Rating Scale".mp.                                            |
| 31. | exp Alzheimer disease/ or alzheimer*.mp. or exp dementia/ or dementia.mp   |
| 32. | exp risk/ or risk.mp. or exp risk factor/                                  |
| 33. | hazard.mp.                                                                 |
| 34. | incident.mp.                                                               |
| 35. | predict*.mp.                                                               |
| 36. | 26 or 27 or 28 or 29 or 30                                                 |
| 37. | 32 or 33 or 34 or 35                                                       |
| 38. | 31 and 36 and 37                                                           |
| 39. | 12 or 25 or 38                                                             |
| 40. | remove duplicates from 39                                                  |

**eTable 1.** Full search conducted through OVID in Medline, Embase and PsychINFO databases. Search terms can appear multiple times, each time optimized for another database.

|                                                                                                                                                                                                                                                                                                         |
|---------------------------------------------------------------------------------------------------------------------------------------------------------------------------------------------------------------------------------------------------------------------------------------------------------|
| <b>General information:</b>                                                                                                                                                                                                                                                                             |
| Author, year, cohort nationality, population description, number of participants, % female, study objectives, recruitment procedure, inclusion/exclusion criteria, % excluded                                                                                                                           |
| <b>Apathy &amp; dementia:</b>                                                                                                                                                                                                                                                                           |
| Criteria, overall number and %, follow-up duration, dementia definition & criteria, number and % incident dementia and/or Alzheimer's disease, number and % developing dementia and/or Alzheimer's disease with and without apathy, reported effect estimates for dementia and analysis characteristics |
| <b>Other factors:</b>                                                                                                                                                                                                                                                                                   |
| Information on demographic characteristics (if possible specific for apathy groups): age, sex, cognitive measures, depression, stroke history, activities of daily living                                                                                                                               |

eTable 2. Items on data extraction form

| Sub-analysis                                                                            | Rationale                                                                                                                                                                                                                                                                                                                                                       | Conception |
|-----------------------------------------------------------------------------------------|-----------------------------------------------------------------------------------------------------------------------------------------------------------------------------------------------------------------------------------------------------------------------------------------------------------------------------------------------------------------|------------|
| High vs low age                                                                         | Older patients have higher risk of both dementia and apathy                                                                                                                                                                                                                                                                                                     | Predefined |
| Excluding vs not excluding depression                                                   | Patients with depression have higher risk of both dementia and apathy                                                                                                                                                                                                                                                                                           | Predefined |
| Long vs short FU                                                                        | FU length must be sufficient for dementia to occur and may provide information on the mechanism of association                                                                                                                                                                                                                                                  | Predefined |
| High vs low bias scores                                                                 | To assess the influence of bias on the overall results                                                                                                                                                                                                                                                                                                          | Predefined |
| - High vs low representativeness bias                                                   | One of the highest scoring risk of bias categories                                                                                                                                                                                                                                                                                                              | Post-hoc   |
| - High vs low FU availability bias                                                      | One of the highest scoring risk of bias categories                                                                                                                                                                                                                                                                                                              | Post-hoc   |
| Meta-regression with age                                                                | Older patients have higher risk of both dementia and apathy                                                                                                                                                                                                                                                                                                     | Predefined |
| Meta-regression with FU length                                                          | FU length must be sufficient for dementia to occur and may provide information on the mechanism of association                                                                                                                                                                                                                                                  | Predefined |
| Sensitivity analysis comparing aMCI and MCI subgroups                                   | MCI and aMCI may have a different relation with apathy and dementia                                                                                                                                                                                                                                                                                             | Post-hoc   |
| Sensitivity analysis comparing Alzheimer's disease to all-cause dementia as outcome     | To assess whether results would have been different if all-cause dementia instead of AD data had been used                                                                                                                                                                                                                                                      | Post-hoc   |
| Meta-regression of follow-up time, validated and custom definitions within MCI patients | Follow-up time explained most heterogeneity in the validated definition group. To assess consistency, this was also analysed in the custom definition group. Meta-regression of follow-up time and type of definition in the combined group provided insight in how much heterogeneity could be explained by the definition type accounting for follow-up time. | Post-hoc   |
| <b>Only for reported effect estimates:</b>                                              |                                                                                                                                                                                                                                                                                                                                                                 |            |
| Adjusting vs not                                                                        | Older patients have higher risk of both dementia and apathy                                                                                                                                                                                                                                                                                                     | Pr         |

|                                                                              |                                                                       |                            |
|------------------------------------------------------------------------------|-----------------------------------------------------------------------|----------------------------|
| adjusting for age                                                            |                                                                       | ed<br>efi<br>ne<br>d       |
| Adjusting vs not adjusting for cognition                                     | Cognitive impairment is associated with both dementia risk and apathy | Pr<br>ed<br>efi<br>ne<br>d |
| Adjusting vs not adjusting for age and cognition                             | Combined adjustment for confounders deemed most important             | Pr<br>ed<br>efi<br>ne<br>d |
| Excluding/adjusting for depression vs not excluding/adjusting for depression | Patients with depression have higher risk of both dementia and apathy | Pr<br>ed<br>efi<br>ne<br>d |

**eTable 3. Sub-analyses and rationale.** Abbreviations: FU: follow-up, aMCI: anamnestic mild cognitive impairment, MCI: mild cognitive impairment, AD: Alzheimer’s disease

|                | Estimate AD                | Estimate all-cause dementia |
|----------------|----------------------------|-----------------------------|
| Ramakers 2010  | OR: 0.67, 95%CI: 0.40–1.13 | “essentially the same”      |
| Peters 2013    | HR: 0.58, 95%CI: 0.18-1.87 | HR: 0.93, 95%CI: 0.43-2.02  |
| Rosenberg 2013 | HR: 1.16, 95%CI: 1.01-1.33 | HR: 1.13, 95%CI: 1.00-1.28  |

**eTable 4. Estimates for AD and dementia compared within studies**

| Study (ref #)       | Representative cohort | Control cohort | Exposure assessment | Outcome assessment | Outcome exclusion | Analysis adjustment | FU length | FU availability | NOS score |
|---------------------|-----------------------|----------------|---------------------|--------------------|-------------------|---------------------|-----------|-----------------|-----------|
| Bartolini 2005 (22) | A (1)                 | A (1)          | C (0)               | A (1)              | A (1)             | B (1)               | C (0)     | A (1)           | 6         |
| Burke 2016 (23)     | A (1)                 | A (1)          | A (1)               | A (1)              | A (1)             | A (2)               | A (1)     | C (0)           | 8         |
| Chan 2011           | C (0)                 | A (1)          | A (1)               | A (1)              | A (1)             | A (2)               | B (1)     | C (0)           | 7         |
| Brodaty 2012        | C (0)                 | A (1)          | A (1)               | A (1)              | A (1)             | C (0)               | B (1)     | B (1)           | 6         |
| Teng 2007 (24)      | C (0)                 | A (1)          | B (0)               | B (0)              | A (1)             | C (0)               | A (1)     | C (0)           | 3         |
| Chilovi 2009 (25)   | A (1)                 | A (1)          | A (1)               | A (1)              | A (1)             | A (2)               | B (1)     | B (1)           | 9         |
| Ramakers 2010 (18)  | A (1)                 | A (1)          | C (0)               | A (1)              | A (1)             | A (2)               | A (1)     | B (1)           | 8         |
| Van der Linde 2011  | C (0)                 | A (1)          | B (0)               | B (0)              | A (1)             | A (2)               | B (1)     | C (0)           | 5         |
| Richard 2012 (13)   | B (0)                 | A (1)          | C (0)               | A (1)              | A (1)             | A (2)               | A (1)     | B (1)           | 7         |
| Somme 2013 (26)     | C (0)                 | A (1)          | A (1)               | A (1)              | A (1)             | B (1)               | A (1)     | C (0)           | 6         |
| Rosenberg 2013 (27) | A (1)                 | A (1)          | A (1)               | B (0)              | A (1)             | A (2)               | B (1)     | C (0)           | 7         |
| Sobow 2014 (28)     | B (0)                 | A (1)          | A (1)               | B (0)              | A (1)             | B (1)               | B (1)     | B (1)           | 6         |
| Pink 2015 (29)      | B (0)                 | A (1)          | A (1)               | A (1)              | A (1)             | A (2)               | A (1)     | B (1)           | 8         |
| Robert 2008 (30)    | C (0)                 | A (1)          | A (1)               | A (1)              | A (1)             | A (2)               | B (1)     | B (1)           | 8         |
| Palmer 2010 (31)    | C (0)                 | A (1)          | A (1)               | A (1)              | A (1)             | B (1)               | B (1)     | B (1)           | 7         |
| Peters 2013 (17)    | C (0)                 | A (1)          | A (1)               | A (1)              | A (1)             | A (2)               | B (1)     | C (0)           | 7         |
| Total/max score     | 5/16                  | 16/16          | 11/16               | 13/16              | 16/16             | 24/32               | 15/16     | 9/16            |           |

**eTable 5. Bias assessment overview.** Risk of bias table. For each category, A indicates low risk of bias, B indicates intermediate risk of bias, and C high risk of bias or insufficient information available on the subject. Scores obtained per category are in parentheses. For most categories, A scores 1 point, B and C no points. For “Analysis adjustment” A scores 2 points and B 1 point. For follow-up length and availability, both category A and B score 1 point. Reasons for scores are detailed in etable 3. Abbreviations: Ref #: reference number, max: maximum, NOS: Newcastle-Ottawa Scale for bias assessment in cohort studies



|           | Representativeness of the exposed cohort                             | Selection of the non-exposed cohort | Ascertainment of exposure                                  | Demonstration outcome was not present at start of the study | Comparability of cohorts based on design or analysis                            | Assessment of outcome                                                         | Was follow-up long enough for outcomes to occur        | Adequacy of follow-up cohorts                                     |
|-----------|----------------------------------------------------------------------|-------------------------------------|------------------------------------------------------------|-------------------------------------------------------------|---------------------------------------------------------------------------------|-------------------------------------------------------------------------------|--------------------------------------------------------|-------------------------------------------------------------------|
| Bartolini | A: memory clinic patients without objectifiable cognitive impairment | A: same community                   | C: motivational items chosen from depression scale         | A: memory clinic diagnosis                                  | B: step-wise logistic regression controls for BDI score and trail making test B | A: single clinical assessment after 1 year                                    | C: 1 year follow-up                                    | A: complete follow-up                                             |
| Burke     | A: memory clinic patients without objectifiable cognitive impairment | A: same community                   | A: NPI-Q administered by health professional               | A: memory clinic diagnosis                                  | A: controls for sex, age, race, Hispanic origin, family history of dementia     | A: yearly screening                                                           | A: 8.4 year follow-up (mean 4.0 years)                 | C: 87% lost to follow-up                                          |
| Chan      | C: mixed sample of volunteers and random recruits                    | A: same community                   | A: NPI administered to informant                           | A: expert psychiatrist evaluation                           | A: controls for age, sex, MMSE and education                                    | A: single measurement at 2 years                                              | B: 2 year follow-up                                    | C: not described                                                  |
| Brodaty   | C: only data for mixed population reported                           | A: same community                   | A: NPI administered to informant                           | A: comprehensive neuropsychological assessment              | C: study does not control for confounders                                       | A: single measurement at 2 years                                              | B: 2 year follow-up                                    | B: 21% lost to follow-up                                          |
| Teng      | C: % in-/excluded not reported                                       | A: same community                   | B: NPI, caregiver report, not detailed whether supervised  | A: memory clinic diagnosis                                  | C: study does not control for confounders                                       | B: screening at follow-up visits, not clearly described                       | A: maximum 5.5 years (mean 2.0 years)                  | C: not described                                                  |
| Chilovi   | A: diagnosis at memory clinic                                        | A: same community                   | A: Clinical diagnosis according to Marin's apathy criteria | A: comprehensive clinical assessment                        | A: adjusted for age, Barthel index, ADAS-cog and depression (DSM-IV)            | A: single clinical assessment after 2 years                                   | B: 2 year follow-up (mean 2 years)                     | B: 4% lost to follow-up                                           |
| Ramakers  | A: diagnosis at memory clinic                                        | A: same community                   | C: subitems of depression scale                            | A: memory clinic diagnosis                                  | A: adjusted for age, education and sex                                          | A: assessment after 2, 5 and 10 years (not for all subjects, minimum 2 years) | A: >88% eligible for 5 year follow-up (mean 5.4 years) | B: 15% lost to follow-up (excluding mortality) with reasons given |

**eTable 6.** Detailed bias assessment table based on the Newcastle-Ottawa rating scale for observational cohort studies. Studies were scored in according to standardized criteria. For the total score, every category scored A (or B or higher in case of follow-up length) was worth one point. The comparability of the cohort on basis of design or analysis could score a maximum of 2 points if both the major confounders of age and cognition were controlled for. NPI-Q: neuropsychiatric inventory Q, NPI: neuropsychiatric inventory, BDI: Beck's Depression Inventory, DSM-IV: Diagnostic and Statistical Manual of Mental Disorders IV

|           | Representativeness of the exposed cohort                                          | Selection of the non-exposed cohort | Ascertainment of exposure                     | Demonstration outcome was not present at start of the study | Comparability of cohorts based on design or analysis                                             | Assessment of outcome                                               | Was follow-up long enough for outcomes to occur                | Adequacy of follow-up cohorts |
|-----------|-----------------------------------------------------------------------------------|-------------------------------------|-----------------------------------------------|-------------------------------------------------------------|--------------------------------------------------------------------------------------------------|---------------------------------------------------------------------|----------------------------------------------------------------|-------------------------------|
| Vd Linde  | C: MMSE score <27 in screened population sample                                   | A: same community                   | B: GMS-AGECAT algorithm: not apathy specific  | A: GMS-AGECAT algorithm                                     | A: controls for age, sex, education, social class, MMSE, subjective and objective memory and ADL | B: single GMS-AGECAT measurement at 2 years equivalent to DSM-IV    | B: 2 year follow-up                                            | C: 38% lost to follow-up      |
| Richard   | B: memory clinic diagnosis from world wide database, depressive symptoms excluded | A: same community                   | C: subitems of depression scale               | A: memory clinic diagnosis                                  | A: controls for age, education, sex and MMSE score                                               | A: biannual or yearly clinical/cognitive assessment                 | A: maximum 5.2 years (mean 2.7 years)                          | B: 4% lost to follow-up       |
| Somme     | C: % in-/excluded not reported                                                    | A: same community                   | A: NPI administered by neuropsychologist      | A: neurological examination                                 | B: controls for MMSE                                                                             | A: yearly assessment                                                | A: 10 year follow-up (mean 3.5 years)                          | C: not described              |
| Rosenberg | A: MCI diagnosis at memory clinic                                                 | A: same community                   | A: NPI-Q administered by health professional  | A: memory clinic diagnosis                                  | A: controls for age, Afro-American race, Hispanic ethnicity, CDR, and MMSE                       | B: screening at follow-up visits, timing of screening not described | B: median follow-up 1.58 years, interquartile range: 1.08-2.09 | C: 51% lost to follow-up      |
| Sobow     | B: Definition of MCI: clinical dementia rating scale = 0.5                        | A: same community                   | A: NPI administered by neuropsychologist      | A: memory clinic diagnosis                                  | B: backward logistic regression controls sex, BMI, and BMI change                                | B: dementia defined as CDR score >0.5 after 2 years                 | B: 2 year follow-up                                            | B: 14% lost to follow-up      |
| Pink      | B: Screened population cohort                                                     | A: same community                   | A: NPI-Q administered by trained professional | A: clinical diagnosis after screening                       | A: controls for age, sex, education and                                                          | A: 15-monthly assessment                                            | A: median follow-up 3.0 years,                                 | B: 15% lost to follow-up      |

|  |  |  |  |  |                        |  |                                                 |  |
|--|--|--|--|--|------------------------|--|-------------------------------------------------|--|
|  |  |  |  |  | medical<br>comorbidity |  | inter<br>quartile<br>range:<br>2.5-5.3<br>years |  |
|--|--|--|--|--|------------------------|--|-------------------------------------------------|--|

**eTable 6 continued.** Detailed bias assessment table based on the Newcastle-Ottawa rating scale for observational cohort studies. Studies were scored in according to standardized criteria. For the total score, every category scored A (or B or higher in case of follow-up length) was worth one point. The comparability of the cohort on basis of design or analysis could score a maximum of 2 points if both the major confounders of age and cognition were controlled for. NPI: neuropsychiatric inventory, NPI-Q: neuropsychiatric inventory Q, MMSE: mini-mental state examination, CDR: clinical dementia rating, BMI: body mass index

|        | Representativeness of the exposed cohort                            | Selection of the non-exposed cohort | Ascertainment of exposure                     | Demonstration outcome was not present at start of the study | Comparability of cohorts based on design or analysis                          | Assessment of outcome         | Was follow-up long enough for outcomes to occur | Adequacy of follow-up cohorts                                                            |
|--------|---------------------------------------------------------------------|-------------------------------------|-----------------------------------------------|-------------------------------------------------------------|-------------------------------------------------------------------------------|-------------------------------|-------------------------------------------------|------------------------------------------------------------------------------------------|
| Robert | C: MCI according to own diagnostic criteria, similar to amnesic MCI | A: same community                   | A: apathy inventory caregiver interview       | A: memory clinic diagnosis                                  | A: controls for age, sex and educational level                                | A: biannual assessment        | B: 3 year follow-up (mean not reported)         | B: 10.3% lost to follow-up                                                               |
| Palmer | C: % in-/excluded not reported                                      | A: same community                   | A: NPI and psychiatric diagnosis              | A: memory clinic diagnosis                                  | B: controls for age, gender, education MMSE and depression but only 15 events | A: yearly assessment          | B: 4 year follow-up (mean 1.4 years)            | B: 24% lost to follow-up, similar baseline characteristics except lower instrumental ADL |
| Peters | C: % in-/excluded not reported & screened population cohort         | A: same community                   | A: NPI-Q administered by trained professional | A: comprehensive clinical assessment                        | A: controls for age, education, APOE4 and 3MS                                 | A: single 18-month assessment | B: 3 year follow-up (mean 3.3 years)            | C: 51% not included in analysis due to incomplete baseline or loss to follow-up          |

**eTable 6 continued.** Detailed bias assessment table based on the Newcastle-Ottawa rating scale for observational cohort studies. Studies were scored in according to standardized criteria. For the total score, every category scored A (or B or higher in case of follow-up length) was worth one point. The comparability of the cohort on basis of design or analysis could score a maximum of 2 points if both the major confounders of age and cognition were controlled for. NPI: neuropsychiatric inventory, NPI-Q: neuropsychiatric inventory Q, MMSE: mini-mental state examination, APOE4: apolipoprotein E allele E4, CDR: clinical dementia rating, BMI: body mass index, 3MS: modified mini-mental state examination,

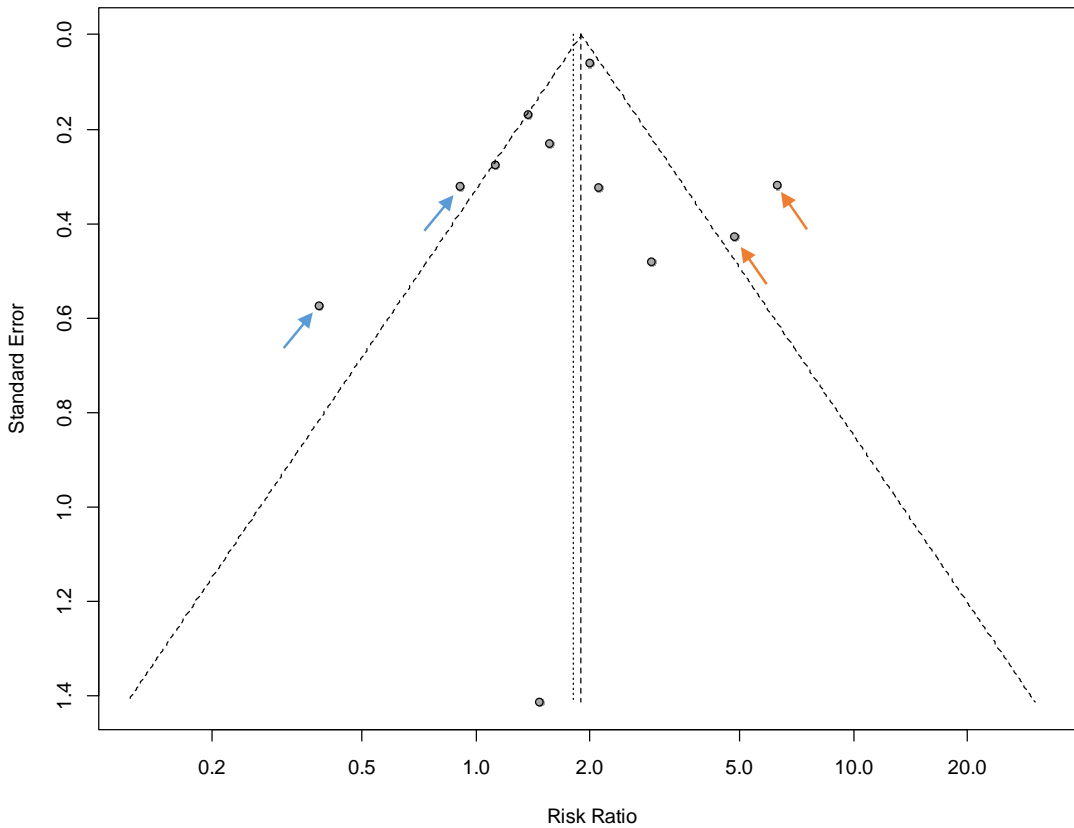

**eFigure 1. Funnel plot for the overall analyses of studies using validated instruments to measure apathy.** The left vertical bar represents the random-effects estimate with 95% confidence intervals, the right vertical bar represents the fixed-effects estimate. The studies with larger than expected effect estimates are those by Sobow et al.(28) and Palmer et al.(31) (red arrows), the studies with lower than expected effect estimates those by Chan et al. and Peters et al (blue arrows).

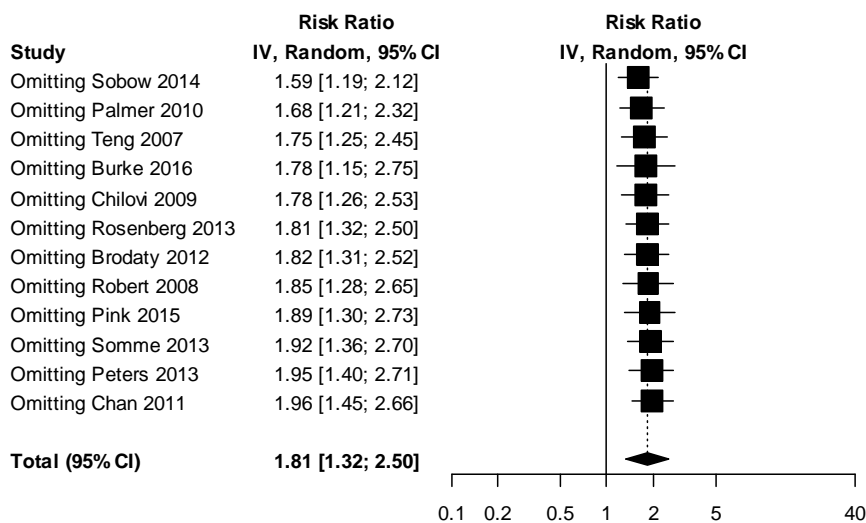

**eFigure 2. Forest plot of leave-one-out analysis.** Depicting the range of overall estimates of the pooled relative risks omitting each study once. RR: Relative Risk, 95%-CI: 95% confidence interval

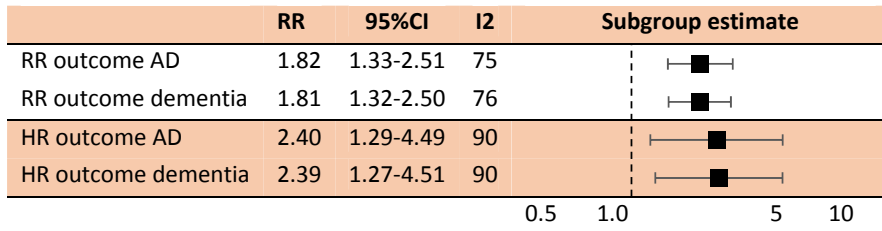

**eFigure 3. sensitivity analysis with AD instead of dementia as preferential outcome**

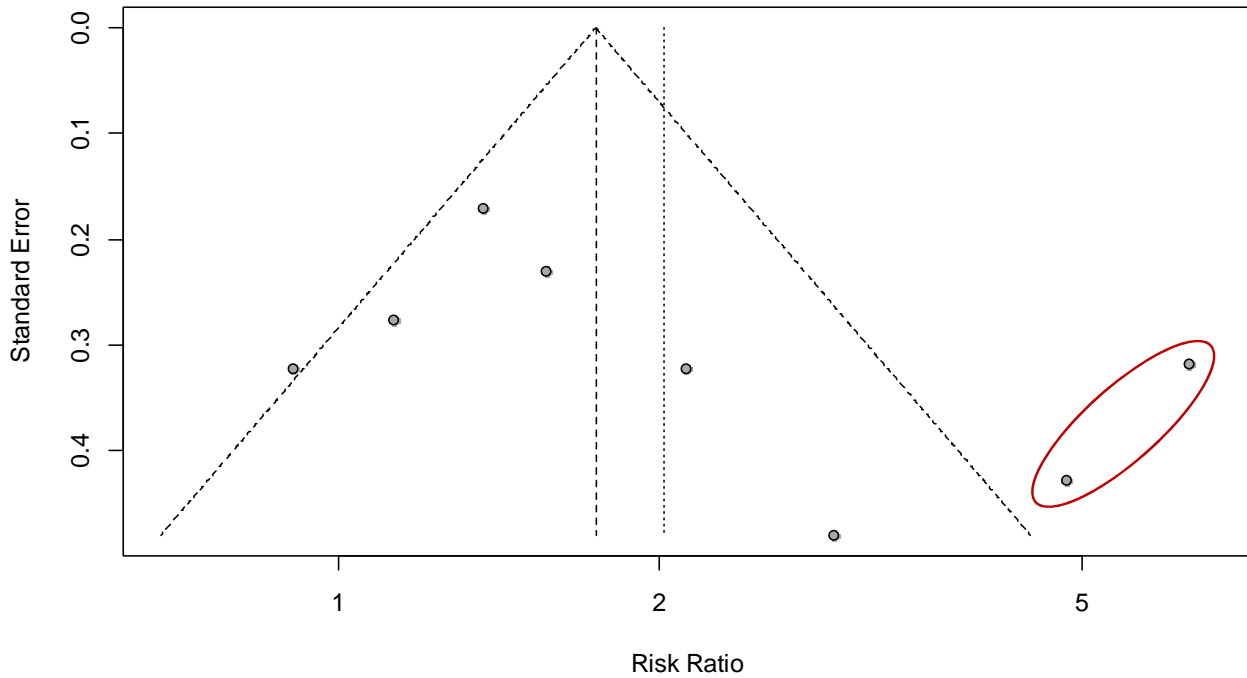

**eFigure 4. Funnel plot for the relative risks reported in studies in the Mild Cognitive Impairment subgroup.** Only studies using validated apathy scales are included. The left vertical bar represents the fixed-effects estimate with confidence intervals based on 1.96 standard deviations. The right vertical bar marks the random-effects estimate. The outlying studies with higher than expected risk ratios by Sobow et al.(28) and Palmer et al(31) (red circle) and the lower standard errors of studies with lower risk ratios suggests some publication bias.

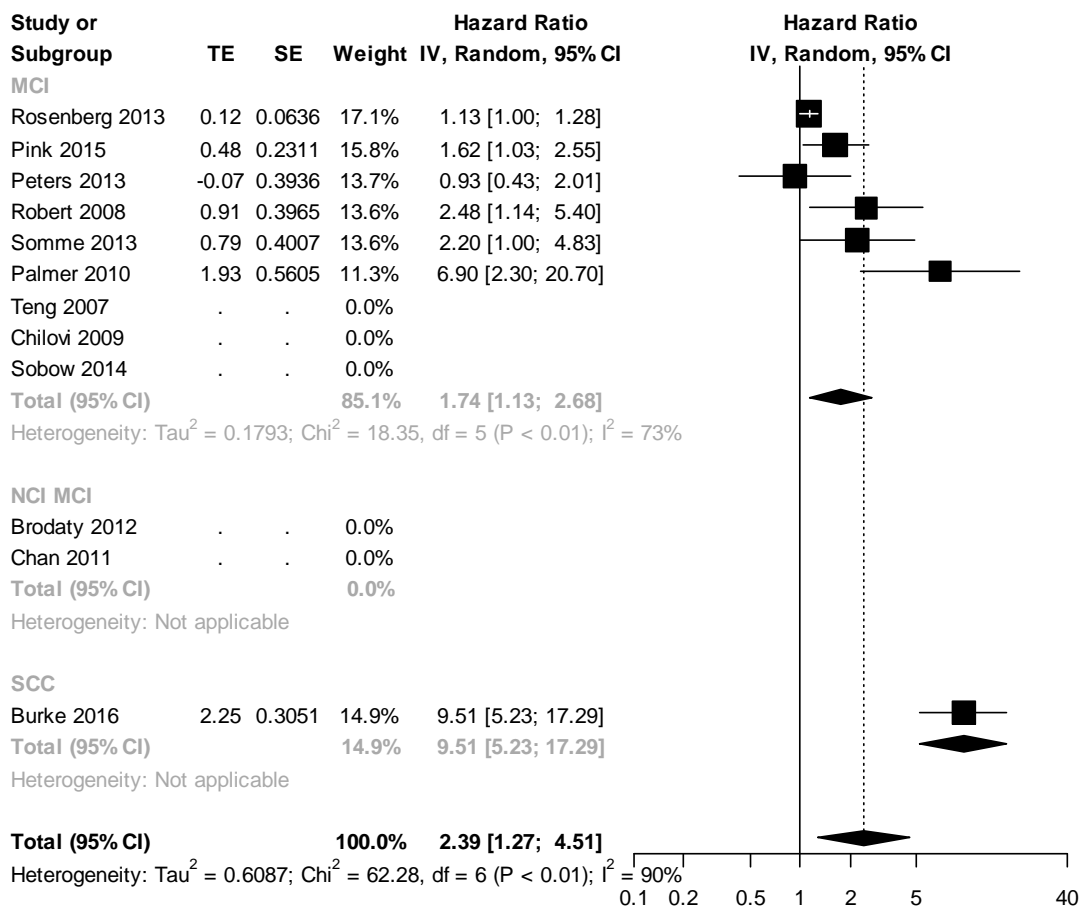

**eFigure 5. Overall and subgroup analyses of HRs in Mild Cognitive Impairment in studies using recommended validated measures to diagnose apathy.** Abbreviations: CIND: cognitive impairment no dementia, MCI: mild cognitive impairment, SCC: subjective cognitive impairment, TE: natural log of effect size, SE: standard error of ES, HR: hazard ratio, 95%-CI: 95% confidence interval



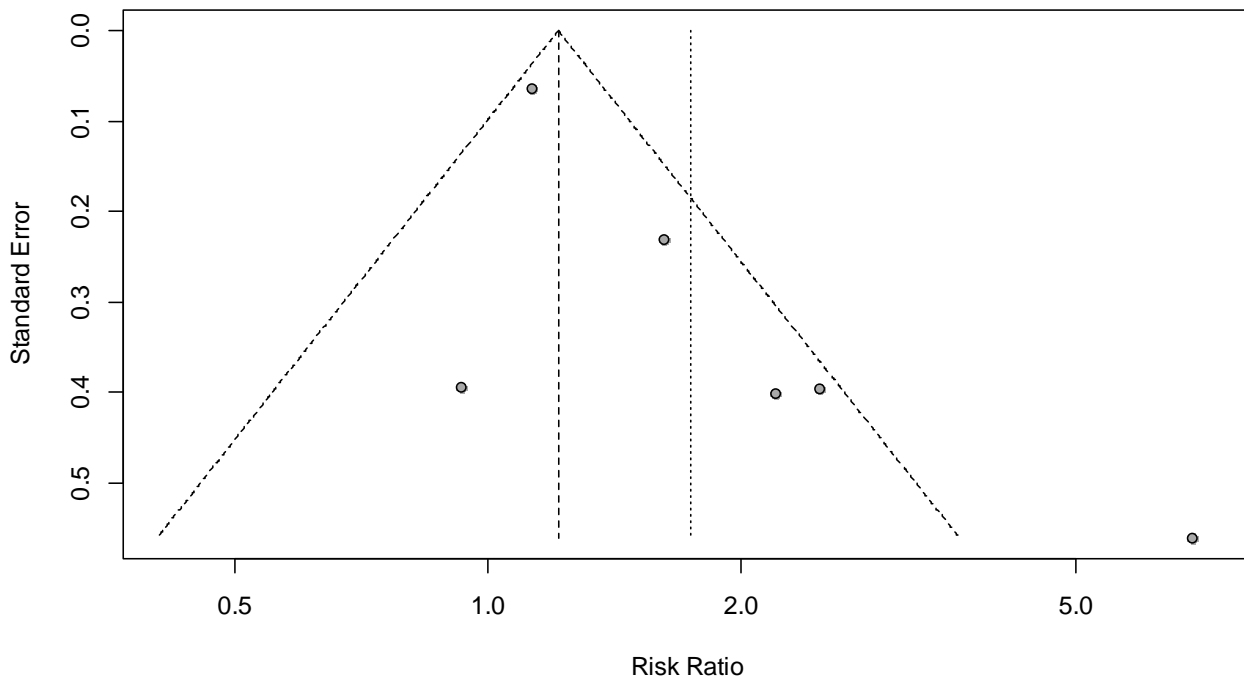

**Figure 6. Funnel plot of hazard ratios reported in studies.** Only studies using validated recommended apathy scales are included. The left vertical bar represents the fixed-effects estimate with 95% confidence intervals. The right vertical bar marks the random-effects estimate. The distribution of studies (nearly all higher than the overall random-effects estimate, with studies with a lower standard error finding less effects) suggests an overrepresentation of studies reporting a significant association between apathy and dementia incidence.

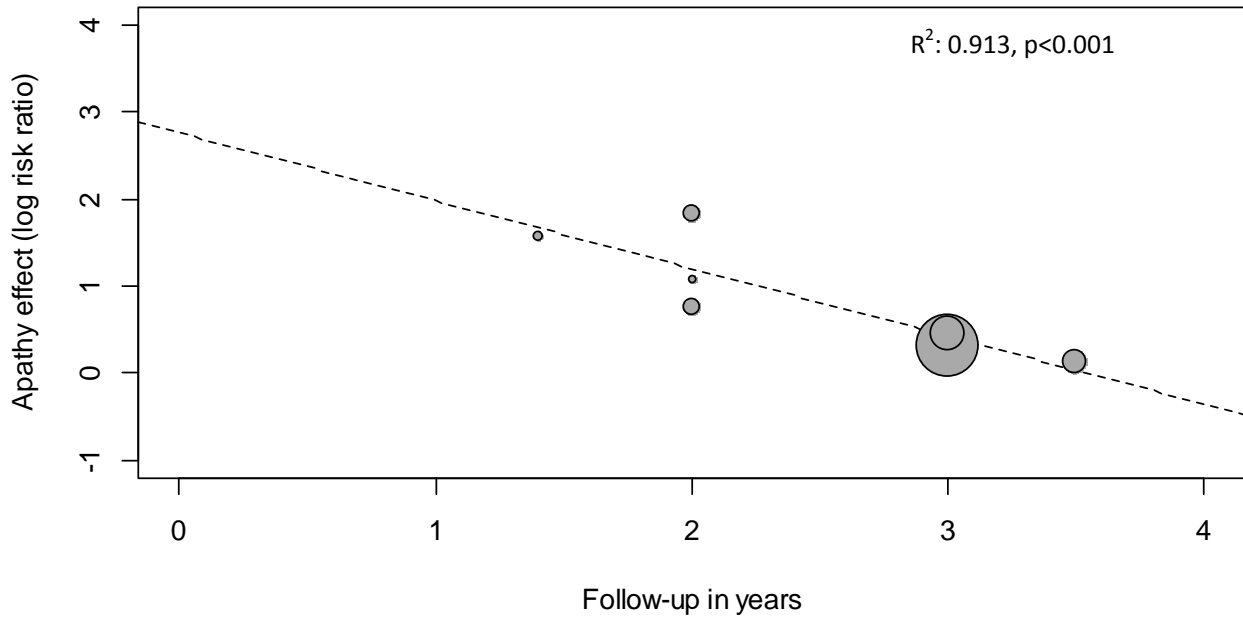

**eFigure 7. Meta-regression of risk ratios for developing dementia in Mild Cognitive Impairment patients with apathy relative to mean follow-up duration in years.** Only studies using validated apathy scales are included (n=7). Each bubble represents a study and bubble size represents the sample size of the study. The regression line shows a trend of declining risk with longer follow-up time.  $R^2$  represents the proportion of heterogeneity explained by the regression

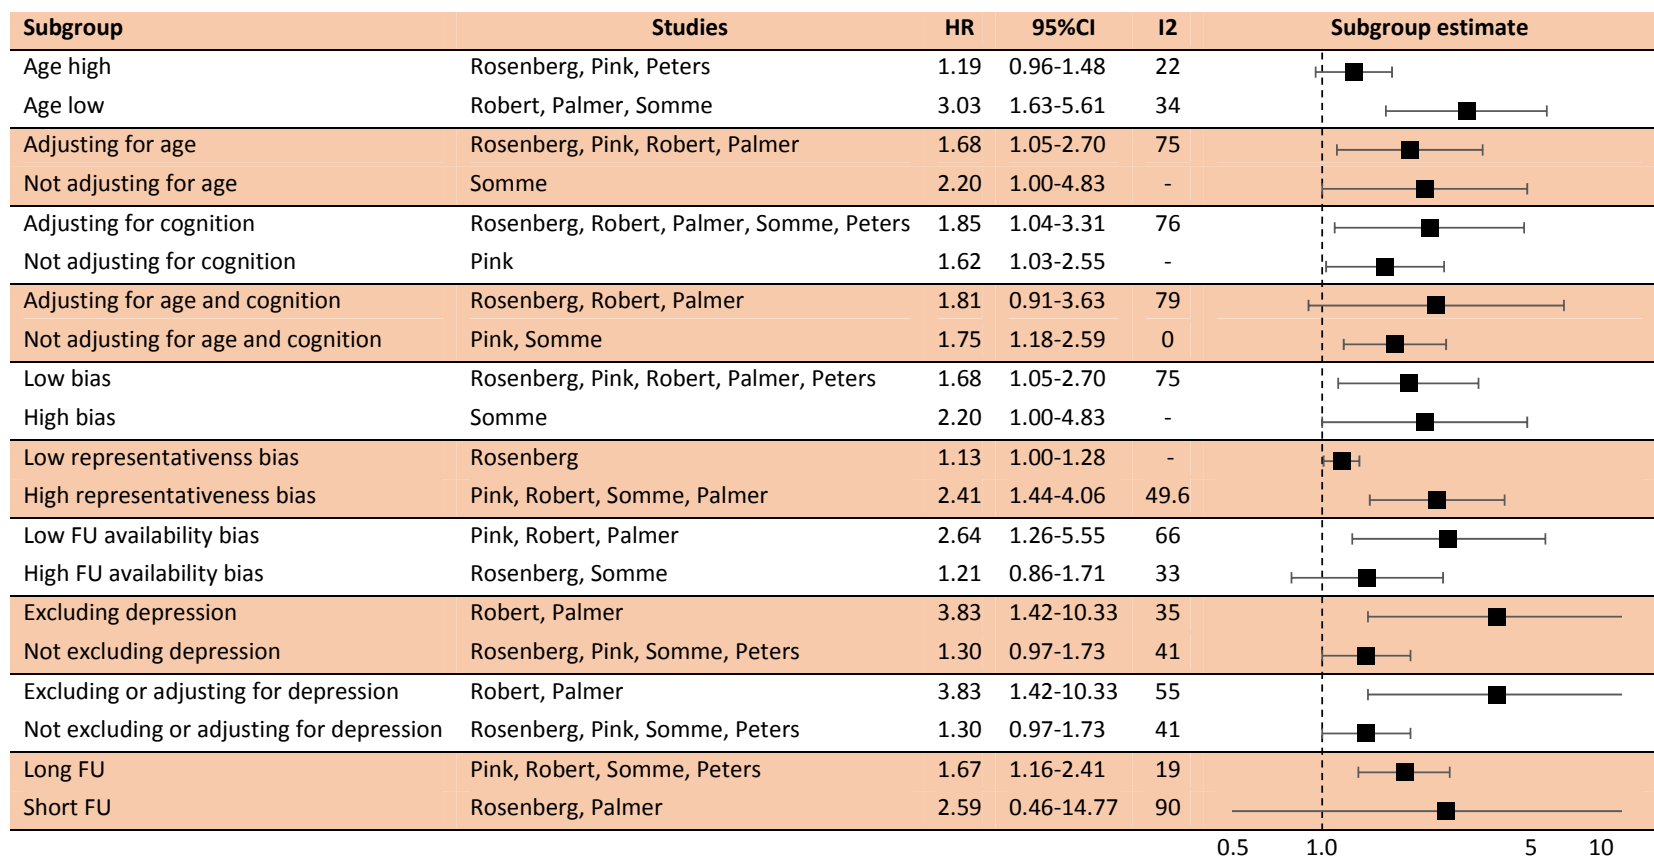

**eFigure 8. Subgroup analyses in Mild Cognitive Impairment patients based on reported maximally adjusted hazard ratios.** Only studies using validated apathy scales are included. FU: follow-up, RR: relative risk, 95%CI: 95% confidence interval

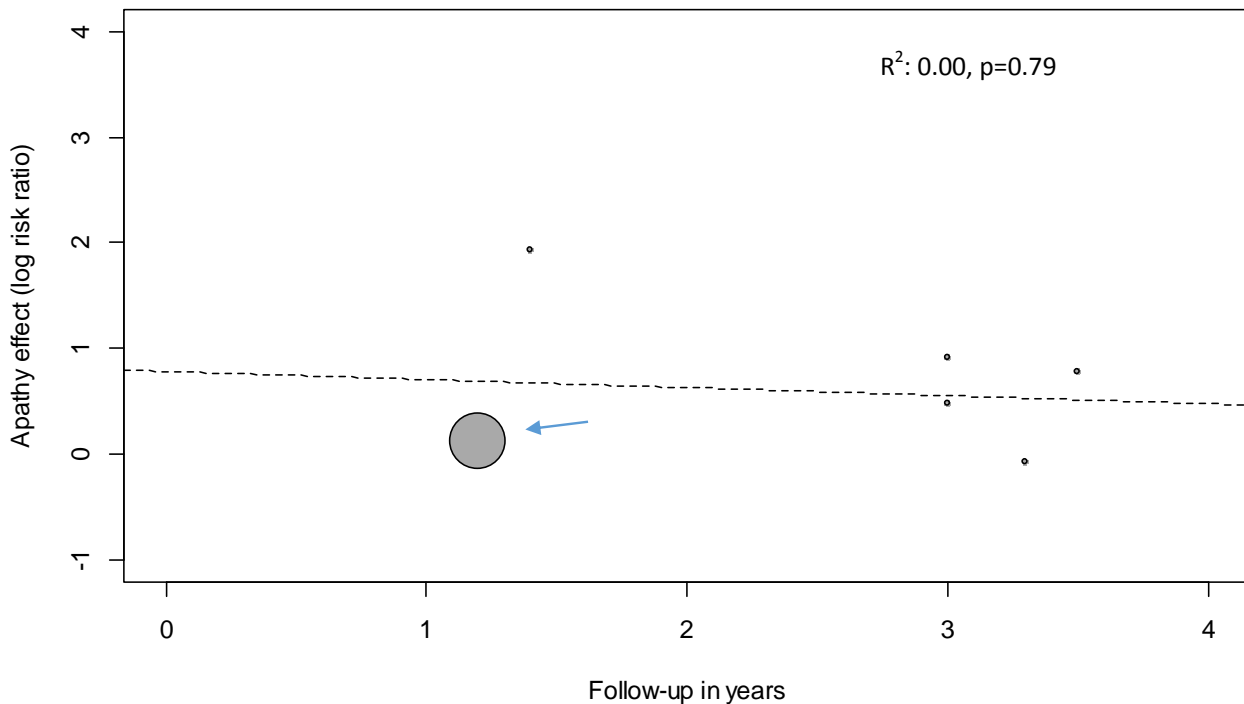

**eFigure 9. Meta-regression of reported hazard ratios for Mild Cognitive Impairment patients with apathy relative to follow-up duration in years.** Only studies using validated recommended apathy scales are included. Each bubble represents a study and bubble size represents the sample size of the study. The regression line shows no association between the follow-up time in years and the size of the reported hazard ratios but seems to be dominated by Rosenberg et al.(27) (blue arrow).  $R^2$  represents the proportion of heterogeneity explained by the regression.

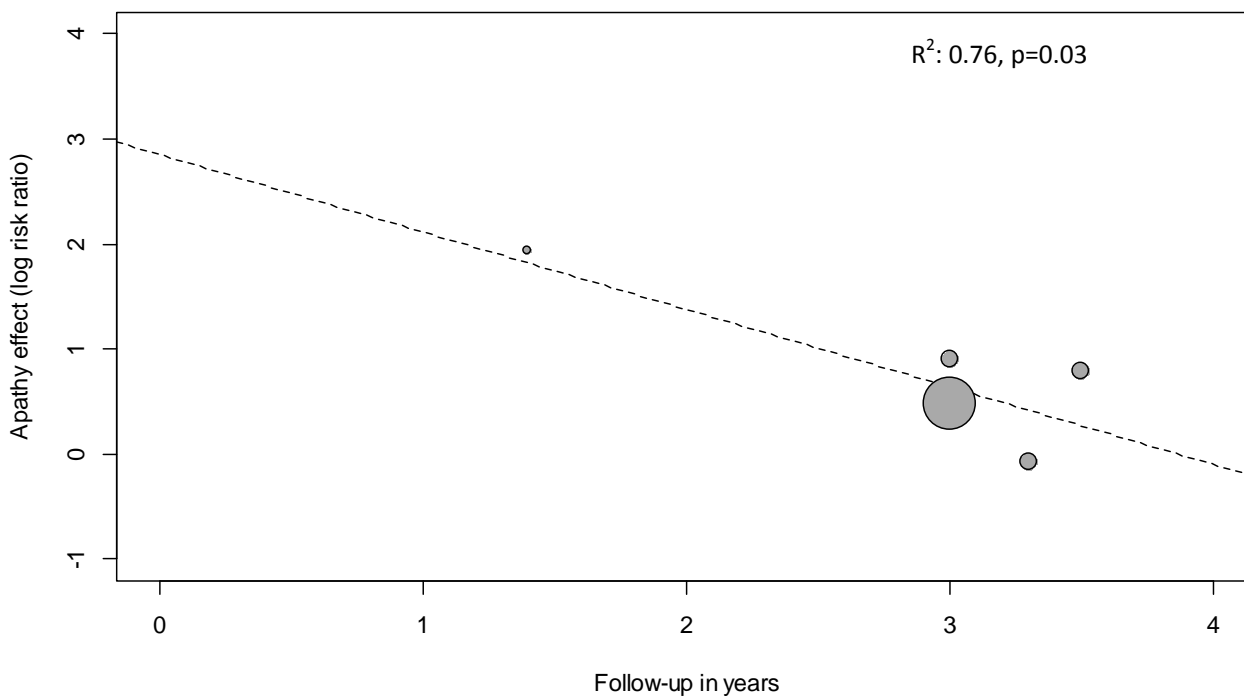

**eFigure 10. Meta-regression of reported hazard ratios for Mild Cognitive Impairment patients with apathy relative to follow-up duration in years.** In this meta-regression the study by Rosenberg et al.(27) identified in Figure 9 was omitted. Only studies using validated apathy scales are included. Each bubble represents a study and bubble size represents the sample size of the study. The regression line suggests decreasing hazard ratio with longer follow-up.  $R^2$  represents the proportion of heterogeneity explained by the regression.

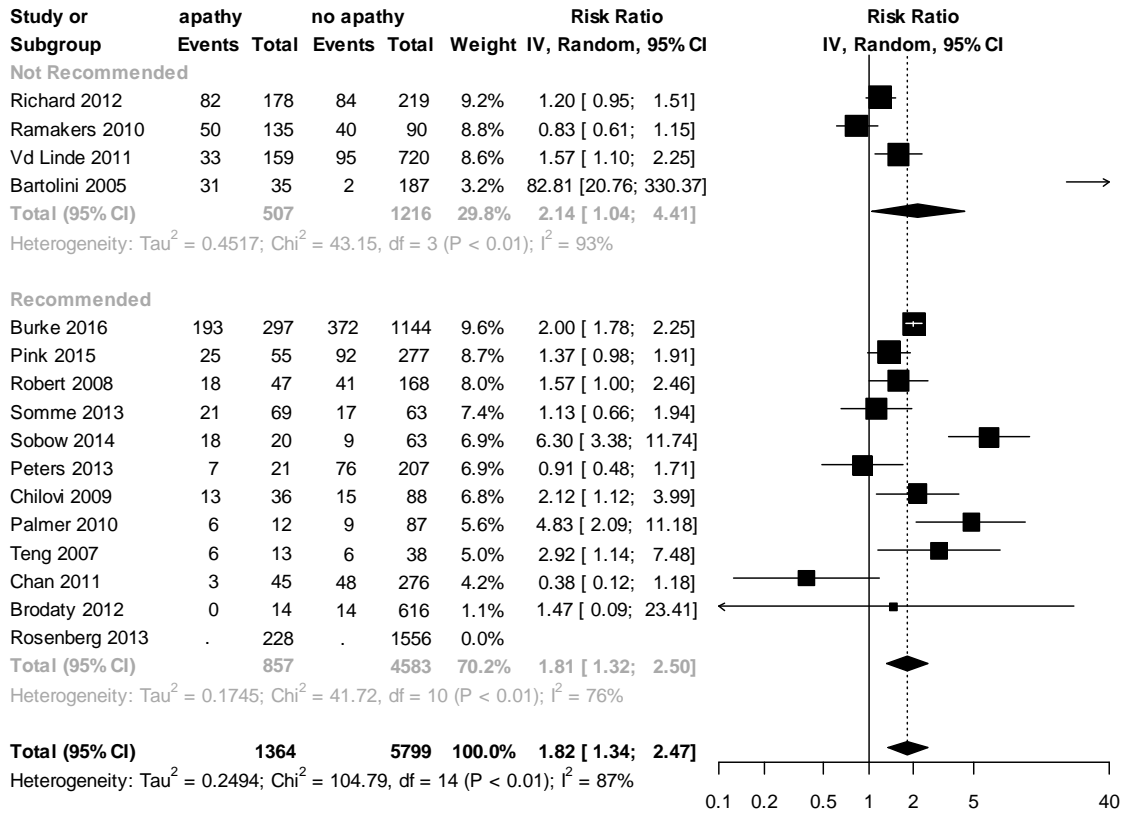

**eFigure 11. Forest plot of calculated Risk Ratio analysis of studies using validated recommended and custom definitions of apathy. 95%-CI: 95% confidence interval**

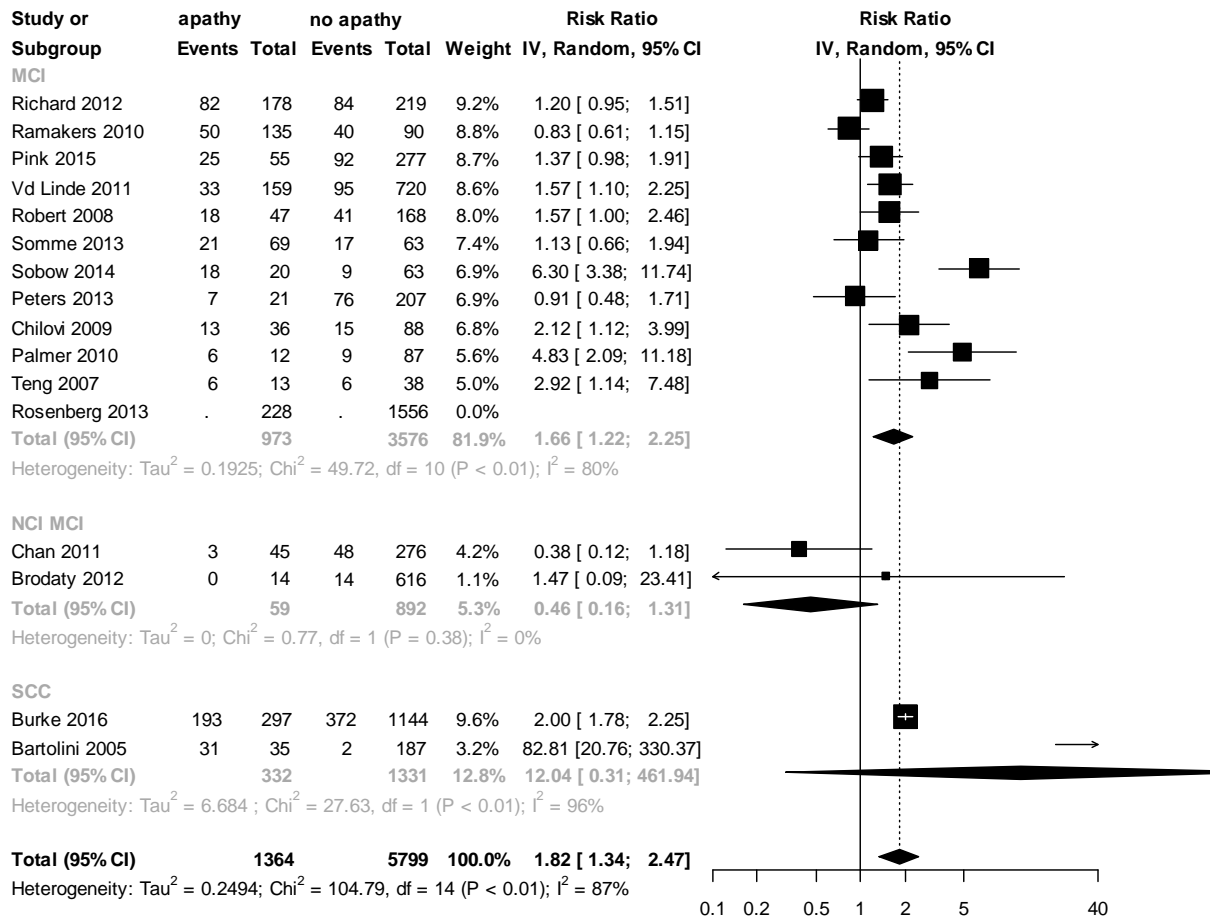

**eFigure 12. Forest plot for relative risk of developing dementia including studies using validated and custom apathy according to subgroups based on diagnosis.** Abbreviations: CIND: cognitive impairment no dementia, MCI: mild cognitive impairment, NCI MCI: mixed normal cognition and MCI, SCC: subjective cognitive impairment, RR: relative risk, 95%-CI: 95% confidence interval

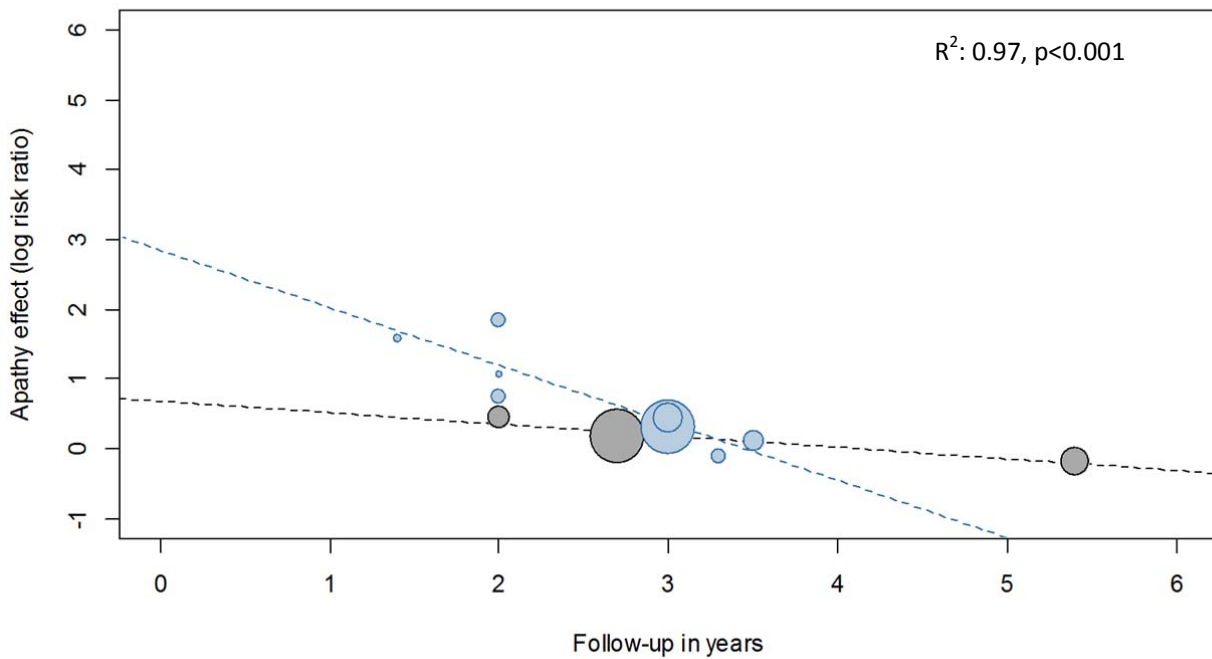

**eFigure 13. Meta-regression of log risk ratio of dementia for patients with apathy in studies using recommended (blue) and custom (grey) definitions over follow-up time (years).** Plots of separate meta-regressions overlaid. Combined meta-regression with follow-up time and definition type with their interaction explained 95% of heterogeneity in study estimates.

|                                | Log RR | 95%CI       | p-value |
|--------------------------------|--------|-------------|---------|
| Intercept                      | 0.69   | 0.19;1.19   | 0.01    |
| FU-time                        | -0.17  | -0.30;-0.03 | 0.02    |
| Recommended definition         | 2.16   | 1.10;3.22   | <0.001  |
| FU-time*Recommended definition | -0.67  | -1.02;-0.30 | <0.001  |

Explained  $I^2$ : 97%

Residual  $I^2$ : 10%

**eFigure 14. Meta-regression results of the log risk ratio for dementia in participants with apathy predicted by FU-time, apathy definition type and their interaction**

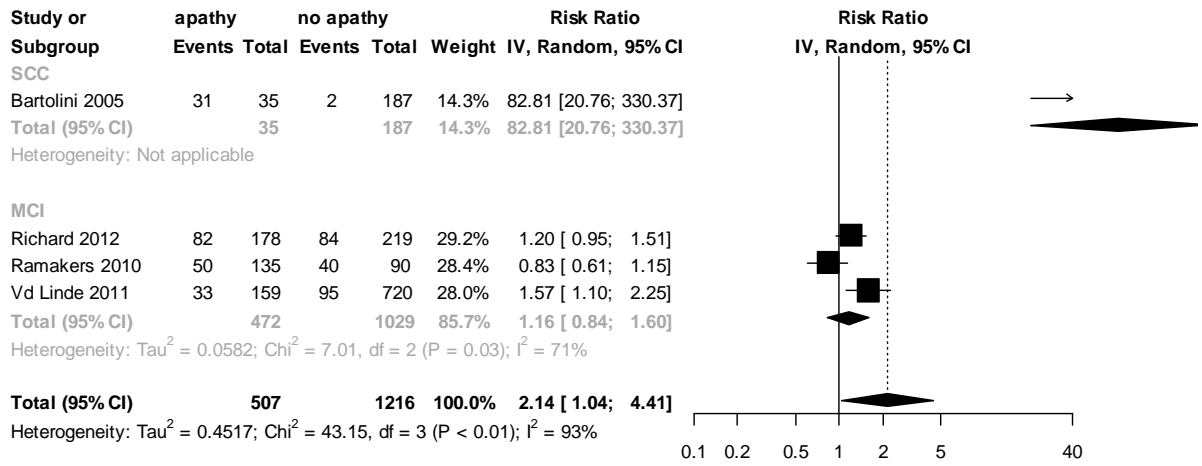

**eFigure 15. Overall and subgroup analyses of RR in MCI and SCC patients for studies using custom definitions of apathy.** MCI: mild cognitive impairment, SCC: subjective cognitive impairment, 95%-CI: 95% confidence interval
